# Supplementary material for: GSVA: gene set variation analysis for microarray and RNA-Seq data
Source: Springer Nature journal article supplement (doi:10.1186/1471-2105-14-7), 2013-01-16

# Input

Gene expression matrix

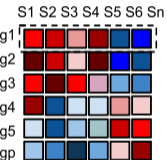

Data base of gene set

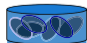

k gene sets

# GSVA Algorithm

1. Gene expression level statistic
2. Rank order per sample
3. KS-like random statistic
4. Different score distributions

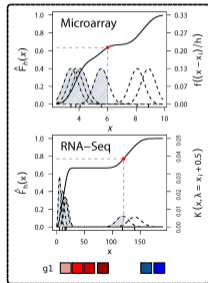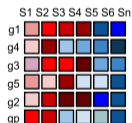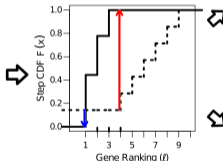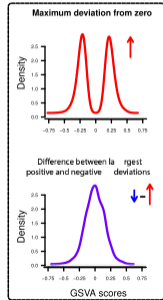

# Output

GSVA score matrix

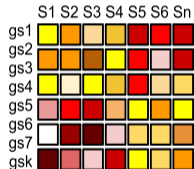

Supplement: 12859_2012_5762_MOESM2_ESM.pdf [file 12859_2012_5762_MOESM2_ESM.pdf]
