# Supplementary material for: GSVA: gene set variation analysis for microarray and RNA-Seq data
Source: Springer Nature journal article supplement (doi:10.1186/1471-2105-14-7), 2013-01-16

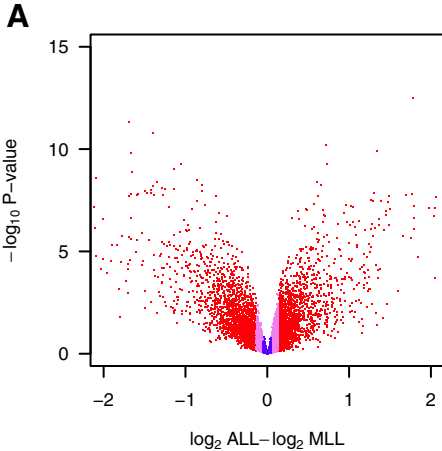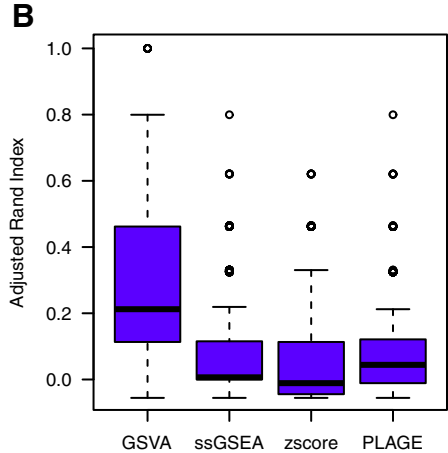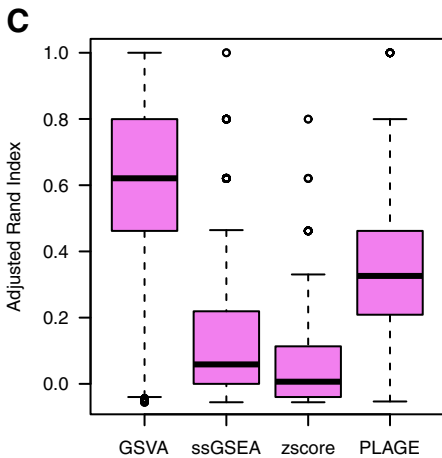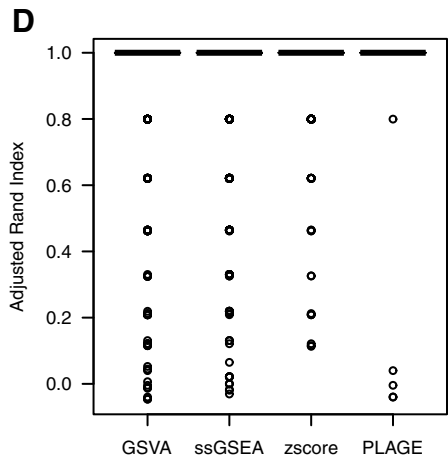

Supplement: 12859_2012_5762_MOESM6_ESM.pdf [file 12859_2012_5762_MOESM6_ESM.pdf]
