# Supplementary material for: GSVA: gene set variation analysis for microarray and RNA-Seq data
Source: Springer Nature journal article supplement (doi:10.1186/1471-2105-14-7), 2013-01-16

**A** Gene level  
(RNA-seq RPKM vs Microarray RMA)

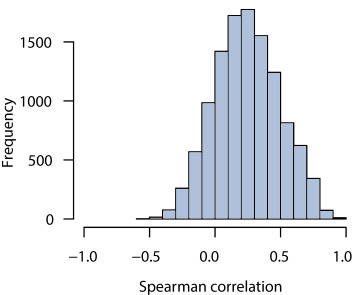

**B** Gene set level  
(GSVA enrichment scores)

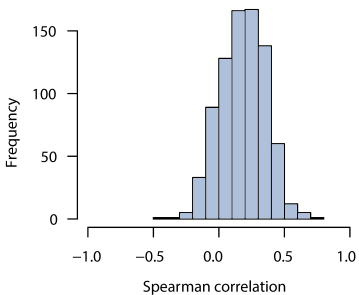

**C** MSY R=0.80

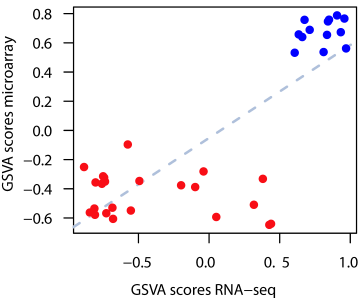

**D** XiE R=0.79

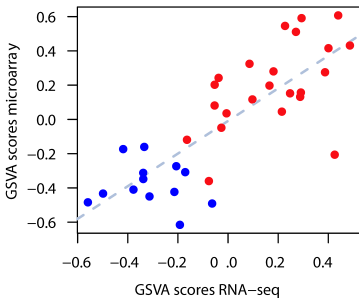

Supplement: 12859_2012_5762_MOESM8_ESM.pdf [file 12859_2012_5762_MOESM8_ESM.pdf]
